# Supplementary material for: About the transformation of low Tm into high Tm poly(l-lactide)s by annealing under the influence of transesterification catalysts
Source: Royal Society of Chemistry journal article supplement (doi:10.1039/d0ra10012a), 2021-01-01
Supplement: d0ra10012a1.pdf [file d0ra10012a1.pdf]

## Supplemental

### About the Transformation of low $T_m$ into high $T_m$ Poly(L-lactide)s by Means of Cyclic Tin Catalysts

Steffen M. Weidner<sup>a</sup>, Andreas Meyer<sup>b</sup>, Saber Chatti<sup>c</sup> and Hans R. Kricheldorf<sup>d,#</sup>,

Table S1 Annealing of cyclic poly(l-lactide)s with SnBiph as catalyst at 130°C and Lac/Cat ratio of 1 000/1

| Exp. No.         | Lac/Cat | T (°C) | t (h) | $M_n$  | $M_w$   | $T_m$ (°C) | $\Delta H_m$ (-J g <sup>-1</sup> ) | Cryst. (%) |
|------------------|---------|--------|-------|--------|---------|------------|------------------------------------|------------|
| 1                | 1 000/1 | 120    | 2     | 63 000 | 187 000 | 176.0      | 42.4                               | 40         |
| 2A               | 1 000/1 | 130    | 24    | 62 000 | 173 500 | 179.0      | 67.0                               | 63         |
| 2B <sup>a)</sup> | 1 000/1 | 130    | 24    | 75 000 | 157 000 | 190.5      | 70.5                               | 65         |
| 3                | 1 000/1 | 130    | 48    | 61 000 | 170 000 | 181.5      | 66.0                               | 62         |
| 4                | 1 000/1 | 130    | 96    | 56 000 | 167 000 | 181.5      | 67.5                               | 63         |
| 5A               | 1 000/1 | 130    | 192   | 39 000 | 144 000 | 182.5      | 66.0                               | 62         |
| 5B <sup>a)</sup> | 1 000/1 | 130    | 192   | 28 000 | 92 000  | 191.5      | 91.7                               | 87         |

a) direct polymerization in bulk at 130°C

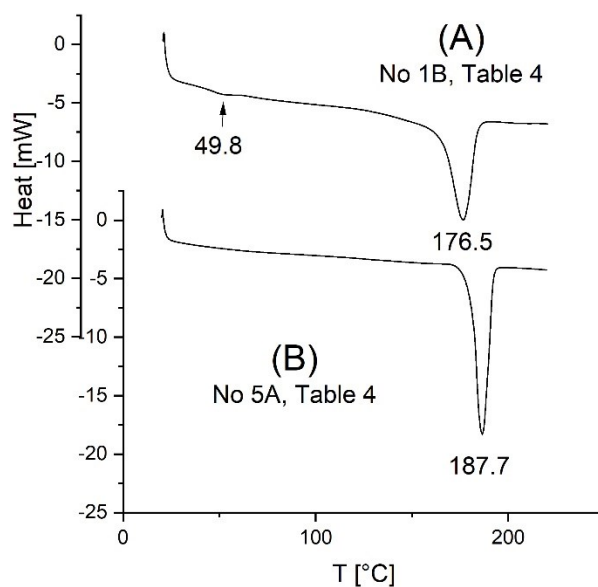

Figure S1 DSC traces of polylactides prepared and annealed with DSTL:(A) 120°C/2h (No. 1B, Tab. 4), (B) 170°C/2d No. 5A, Tab. 4)

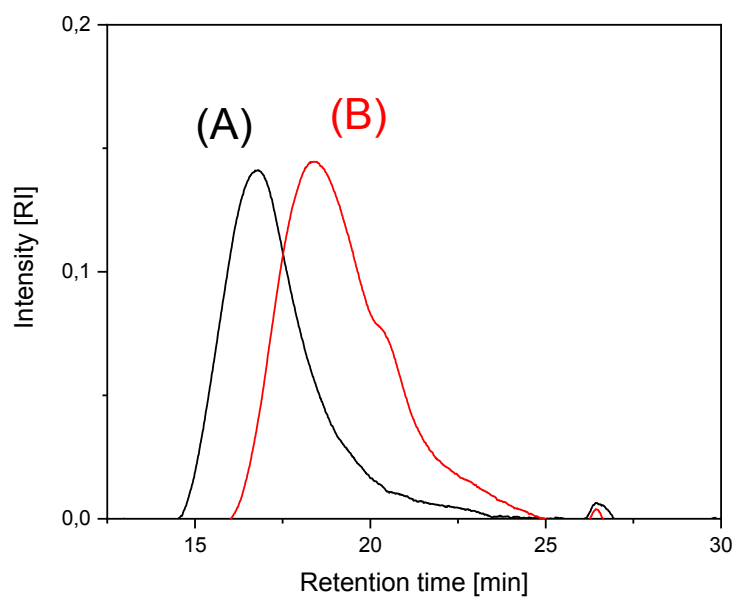

Figure S2 SEC curves of poly(lactides) prepared and annealed with BuSnBuca: (A) 120°C/2h (No. 1, Tab. 5), (B) BuSnBuca 170°C/2d (No. 3, Tab. 5)

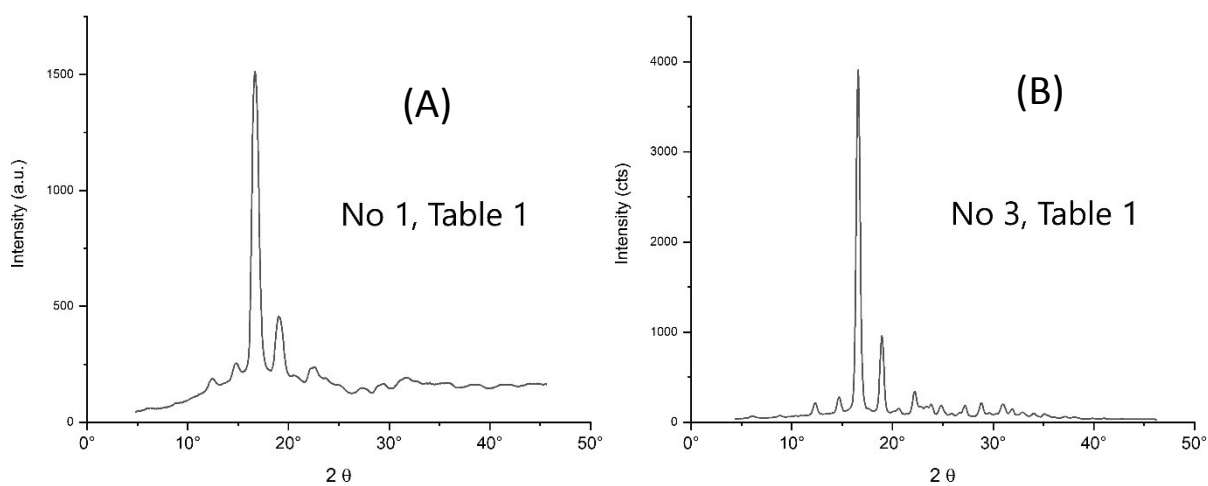

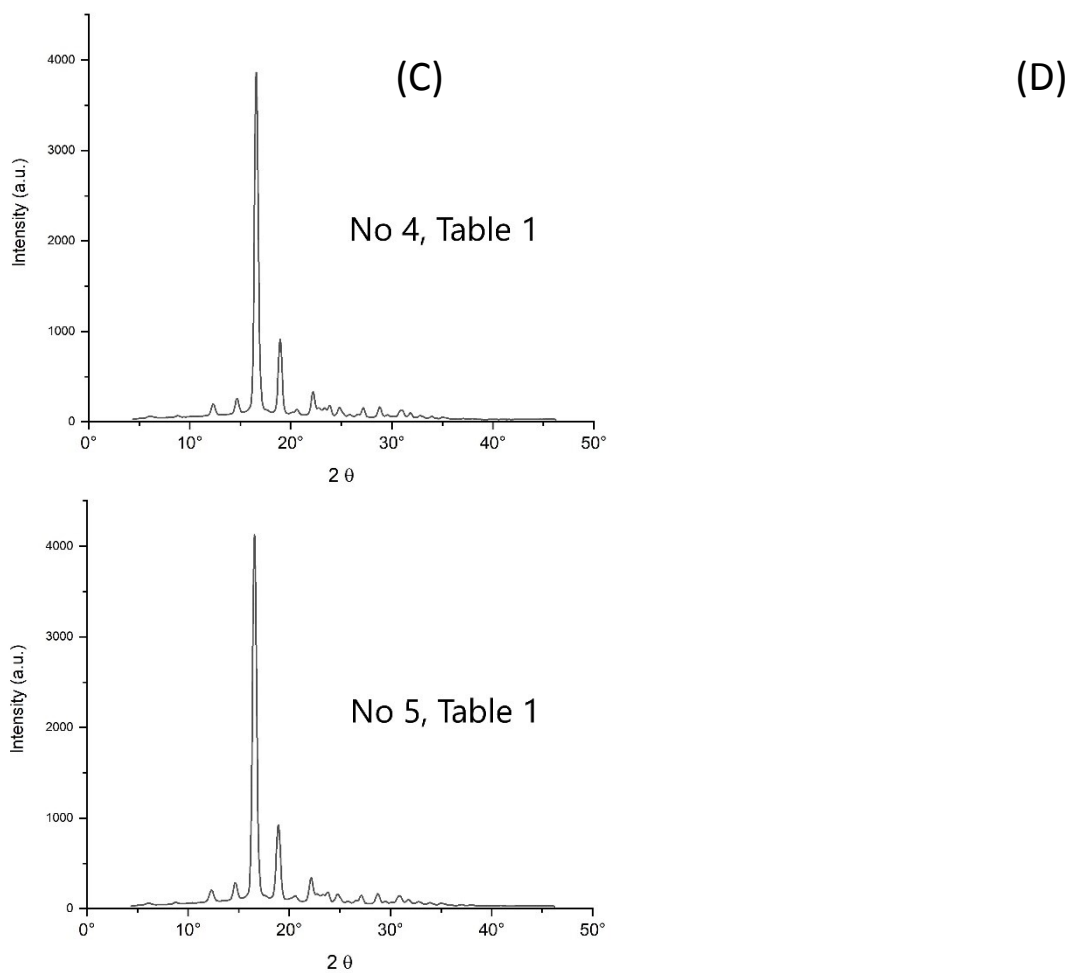

Figure S3 WAXS powder pattern of polylactides prepared and annealed with SnBiph: (A) 120°C/2h (No.1, Tab. 1), (B) 170°C/8h (No. 3, Tab. 1), (C) 170°C/1d (No. 4, Tab. 1), (D) 170°C/2d (No.5, Tab.1)

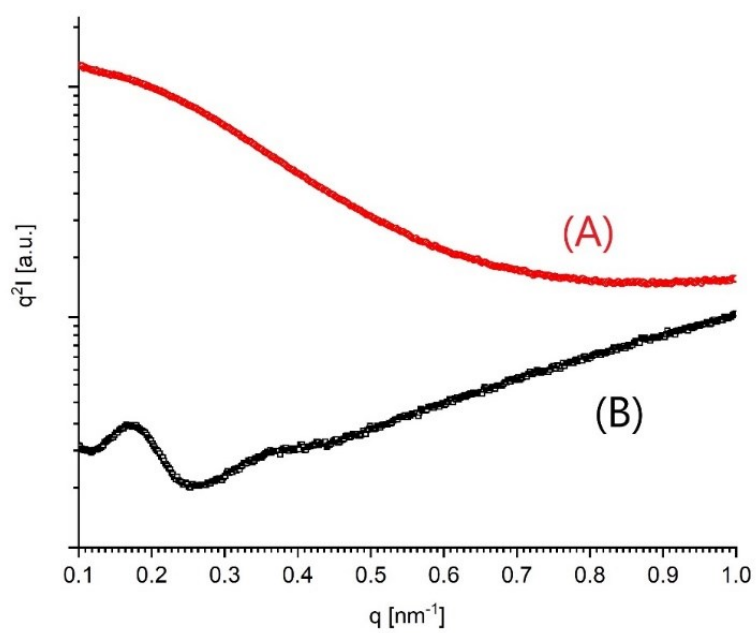

Figure S4 SAXS Kratky plots of polylactides prepared and annealed with SnBiph: (A) 120°C/2h (No.1, Tab. 1),(B) 170°C/8h, No. 3, Table 1)

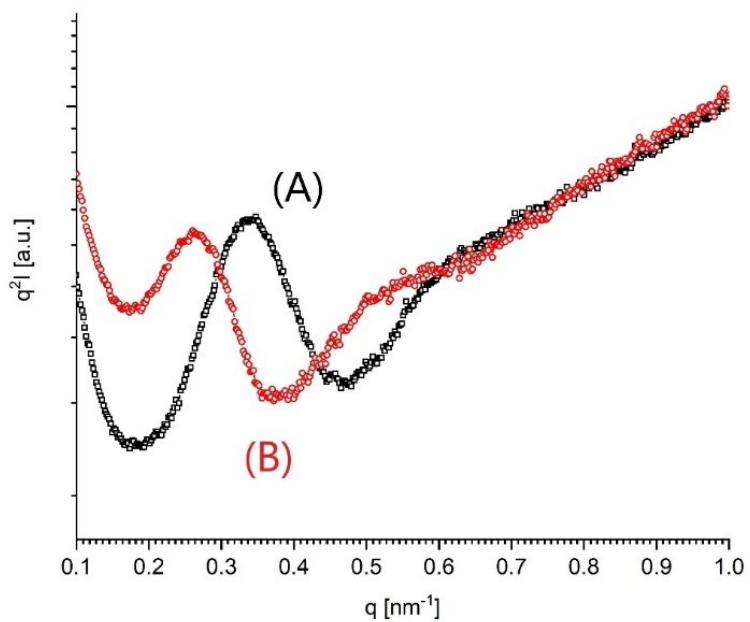

Figure S5 SAXS Kratky plots of polylactides prepared and annealed with BuSnBiph: (A) 120/2h (No. 4, Tab. 5); (B) 170°C/1d (No. 5, Tab. 5)

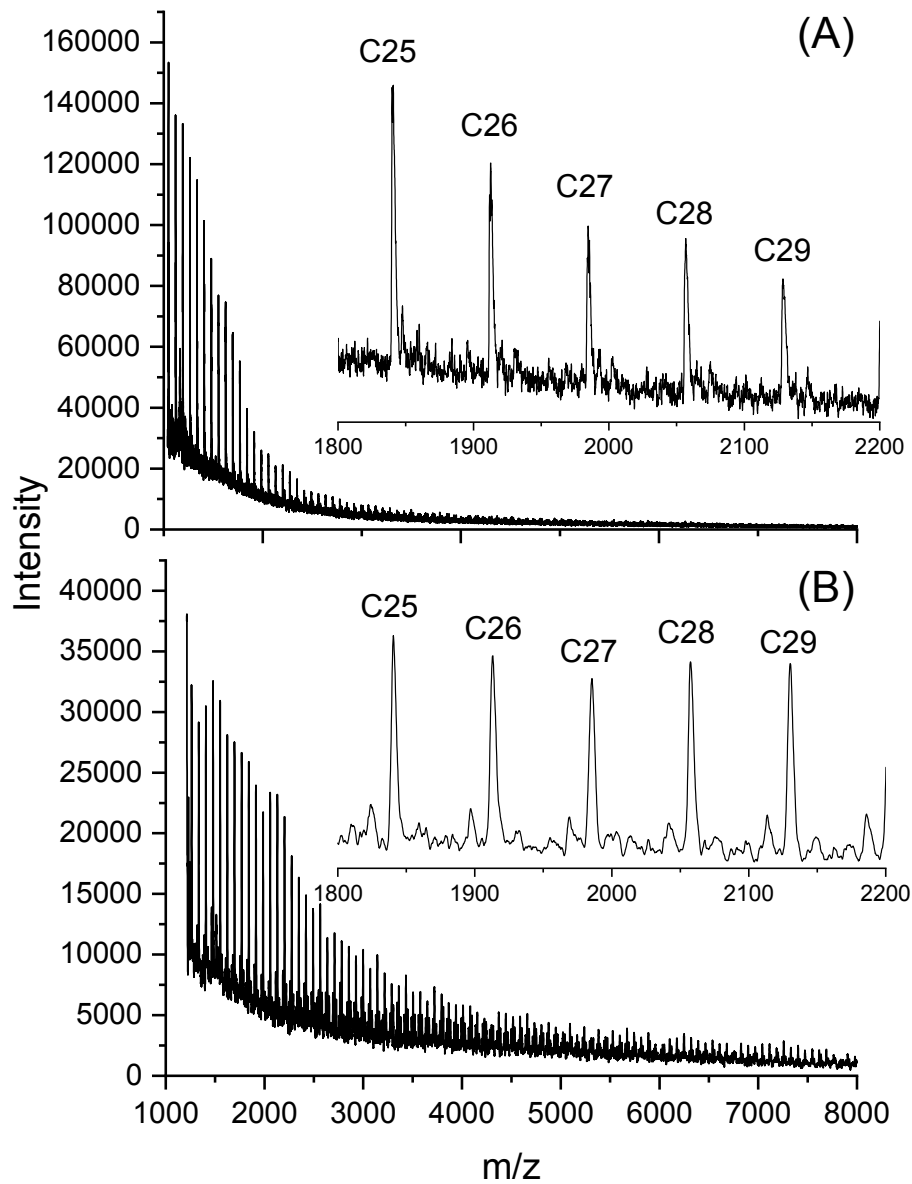

Figure S6 MALDI-TOF mass spectra of polylactides prepared and annealed with BuSnBiph: (A) 120°C/2h (No. 4, Table 5), (B) 170°C/48h (No. 6, Tab. 5)
